# Supplementary material
Source: publisher figshare collection journal article supplement (https://sage.figshare.com/ndownloader/files/22055709)
Supplement: Supplementary file 1 [file 22055709]

## Appendix

**Table A1.** Share of workers by national origin and individual characteristics.

|                               |                           | Ita  | Rum  | Alb  | Mor  | Ukr  | Chn  | Phi  | Tun  | HIC  | Other |
|-------------------------------|---------------------------|------|------|------|------|------|------|------|------|------|-------|
| Total                         |                           |      |      |      |      |      |      |      |      |      |       |
| Gender                        | Male                      | 60.7 | 45.1 | 69.1 | 77.7 | 16.4 | 57.7 | 40.8 | 81.2 | 34.8 | 57.2  |
|                               | Female                    | 39.3 | 54.9 | 30.9 | 22.3 | 83.6 | 42.3 | 59.2 | 18.8 | 65.2 | 42.8  |
| Age                           | 15-24                     | 4.6  | 8.4  | 10.7 | 5.4  | 4.8  | 12.4 | 5.4  | 5.8  | 2.2  | 7.3   |
|                               | 25-34                     | 20.6 | 33.3 | 32.4 | 22.7 | 14.1 | 23.8 | 20.9 | 19.8 | 25.8 | 26.7  |
|                               | 35-44                     | 30.7 | 37.0 | 32.3 | 39.9 | 25.0 | 37.9 | 31.2 | 39.3 | 31.7 | 34.7  |
|                               | 45-54                     | 28.8 | 17.1 | 19.1 | 25.0 | 36.8 | 22.0 | 26.6 | 29.3 | 27.9 | 23.3  |
|                               | 55 or more                | 15.2 | 4.1  | 5.4  | 7.1  | 19.3 | 4.0  | 15.8 | 5.8  | 12.4 | 8.0   |
| Area of residence             | North-West                | 23.6 | 13.7 | 20.9 | 21.3 | 8.7  | 14.6 | 18.5 | 10.9 | 12.6 | 23.2  |
|                               | North-East                | 24.4 | 13.7 | 18.7 | 19.9 | 17.3 | 16.6 | 9.0  | 11.3 | 16.7 | 22.6  |
|                               | Centre                    | 18.7 | 24.5 | 17.0 | 8.5  | 11.6 | 10.1 | 29.6 | 8.5  | 21.8 | 16.6  |
|                               | South                     | 33.3 | 48.1 | 43.4 | 50.3 | 62.4 | 58.7 | 42.9 | 69.3 | 48.8 | 37.6  |
| Father's education            | Primary or less           | 55.9 | 37.6 | 42.4 | 79.5 | 36.6 | 66.6 | 50.6 | 79.1 | 25.1 | 52.6  |
|                               | Lower secondary           | 22.7 | 31.1 | 30.2 | 13.3 | 26.9 | 22.0 | 23.0 | 10.2 | 22.3 | 21.7  |
|                               | Upper secondary           | 16.7 | 27.5 | 20.5 | 5.3  | 25.3 | 7.8  | 18.7 | 9.8  | 36.0 | 18.0  |
|                               | Tertiary or more          | 4.6  | 3.8  | 6.9  | 1.9  | 11.3 | 3.6  | 7.7  | 0.8  | 16.7 | 7.7   |
| Education                     | Primary or less           | 5.7  | 6.2  | 7.5  | 35.1 | 5.3  | 22.3 | 13.9 | 33.5 | 3.7  | 17.3  |
|                               | Lower secondary           | 28.6 | 23.7 | 43.4 | 32.9 | 17.2 | 51.0 | 28.8 | 39.3 | 13.3 | 28.8  |
|                               | Upper secondary           | 48.4 | 62.6 | 43.2 | 28.1 | 54.3 | 23.5 | 40.5 | 24.6 | 50.0 | 41.4  |
|                               | Tertiary or more          | 17.3 | 7.5  | 5.9  | 4.0  | 23.3 | 3.2  | 16.8 | 2.7  | 33.1 | 12.6  |
| Familiar status               | Single                    | 12.9 | 34.4 | 15.5 | 31.0 | 55.3 | 18.1 | 29.9 | 34.1 | 31.9 | 34.7  |
|                               | Married with children     | 51.3 | 34.1 | 61.7 | 47.3 | 12.5 | 51.7 | 41.0 | 44.4 | 37.9 | 38.7  |
|                               | Married without children  | 13.9 | 20.5 | 8.3  | 10.2 | 14.8 | 13.6 | 16.6 | 12.6 | 18.3 | 12.8  |
|                               | Child living with parents | 17.8 | 4.9  | 10.7 | 7.0  | 6.5  | 10.4 | 6.0  | 6.1  | 3.3  | 6.6   |
|                               | Parent alone              | 4.2  | 6.2  | 3.8  | 4.6  | 10.8 | 6.2  | 6.5  | 2.7  | 8.6  | 7.2   |
| Ita educational qualification | Yes                       | -    | 3.0  | 10.2 | 8.6  | 3.1  | 10.0 | 4.9  | 7.5  | 12.7 | 9.4   |
|                               | No                        | -    | 97.0 | 89.8 | 91.4 | 96.9 | 90.0 | 95.1 | 92.5 | 87.3 | 90.6  |
| Attendance Ita courses        | Yes                       | -    | 6.6  | 6.5  | 18.1 | 13.9 | 13.9 | 18.2 | 9.0  | 16.5 | 20.0  |
|                               | No                        | -    | 93.4 | 93.5 | 81.9 | 86.1 | 86.1 | 81.7 | 91.0 | 83.5 | 80.0  |
| Language proficiency          | Yes                       | -    | 66.3 | 69.1 | 54.0 | 58.4 | 16.6 | 37.2 | 61.4 | 75.1 | 55.7  |
|                               | No                        | -    | 33.6 | 30.9 | 46.0 | 41.6 | 83.4 | 62.8 | 38.6 | 24.9 | 44.3  |
| Catholic religion             | Yes                       | -    | 14.4 | 23.1 | 0.6  | 22.0 | 5.7  | 86.6 | 1.4  | 67.7 | 30.9  |
|                               | No                        | -    | 85.6 | 76.9 | 99.4 | 78.0 | 94.3 | 13.4 | 98.6 | 32.3 | 69.1  |
| Feeling of Ita like home      | Yes                       | -    | 41.8 | 44.1 | 37.0 | 32.3 | 17.8 | 41.0 | 38.2 | 45.6 | 36.3  |
|                               | No                        | -    | 58.2 | 55.9 | 63.0 | 67.7 | 82.2 | 59.0 | 61.8 | 54.4 | 63.7  |
| Job found due to compatriots  | Yes                       | -    | 41.8 | 44.1 | 37.0 | 32.3 | 17.8 | 41.0 | 38.2 | 45.6 | 36.3  |
|                               | No                        | -    | 58.2 | 55.9 | 63.0 | 67.7 | 82.2 | 59.0 | 61.8 | 54.4 | 63.7  |

**Table A2.** Definition of variables for research question 2 (*socio-cultural assimilation hypothesis, ethnic network hypothesis*).

| Variable name                                 | Variable description                                                                              | Original definition                    | New definition                      |
|-----------------------------------------------|---------------------------------------------------------------------------------------------------|----------------------------------------|-------------------------------------|
| <i>Socio-cultural assimilation hypothesis</i> |                                                                                                   |                                        |                                     |
| Length of living in Italy                     | Years from your last or unique stay in Italy <sup>a</sup>                                         |                                        |                                     |
| Italian educational qualification             | In which country did you attain your highest educational qualification?                           | 0 = outside Italy<br>1 = in Italy      |                                     |
| Attendance of courses in Italian              | Since you have been living in Italy, have you attended one course or lessons of Italian language? | 0 = no<br>1 = yes                      |                                     |
| Language proficiency                          | When you speak with an Italian, do you have trouble in making yourself understood?                | 1 = a lot<br>2 = quite<br>3 = a little | 0 = no                              |
|                                               |                                                                                                   | 4 = at all                             | 1 = yes                             |
| Catholic religion                             | What is your current religion?                                                                    |                                        | 0 = other religions<br>1 = Catholic |
| Feeling of Italy like home                    | Do you agree with the statement ‘I feel at home in Italy’?                                        | 1 = strongly agree<br>2 = agree        | 1 = yes                             |
|                                               |                                                                                                   | 3 = disagree<br>4 = strongly disagree  | 0 = no;                             |
| <i>Ethnic networks hypothesis<sup>b</sup></i> |                                                                                                   |                                        |                                     |
| Job found due to compatriots                  | Did you find the job due to your compatriots’ help? <sup>c</sup>                                  |                                        | 0 = no;<br>1 = yes                  |

Note:

a) By using this variable, we ruled out migrant workers whose the current stay is not their first stay in Italy. We believe indeed that the continuity of a permanent stay is an important indicator of socio-cultural assimilation.

b) Unlike other studies we do not group together individuals from different national origins (even geographically homogeneous); we believe that the ethnic network plays a role only among compatriots, especially in Italy, where national groups coming from countries with linguistic affinities or with particular colonial ties are nearly not existent (differently for instance from France, Portugal, Spain, or the Anglo-Saxon countries).

c) This variable has been obtained by crossing two questions: 1) How did you find your first job in Italy?; 2) Persons who helped you in finding your first job in Italy.

**Table A3.** Migrants' Isei mean at first and current job by individual characteristics.

| Variables                               |     | Isei<br>first job | Isei<br>current job | Isei current job<br>- Isei first job |
|-----------------------------------------|-----|-------------------|---------------------|--------------------------------------|
| <i>Human capital hyp</i>                |     |                   |                     |                                      |
| <i>Father's education:</i>              |     |                   |                     |                                      |
| Primary or less                         |     | 30.4              | 31.2                | 0.8                                  |
| Lower secondary                         |     | 32.0              | 32.8                | 0.8                                  |
| Upper secondary                         |     | 34.9              | 36.1                | 1.2                                  |
| Tertiary or more                        |     | 40.8              | 41.9                | 1.1                                  |
| <i>Education:</i>                       |     |                   |                     |                                      |
| Primary or less                         |     | 29.1              | 29.8                | 0.7                                  |
| Lower secondary                         |     | 30.1              | 30.8                | 0.7                                  |
| Upper secondary                         |     | 32.5              | 33.2                | 0.7                                  |
| Tertiary or more                        |     | 40.9              | 43.2                | 2.3                                  |
| <i>Socio-cultural assimilation hyp.</i> |     |                   |                     |                                      |
| Italian educational qualification       | Yes | 38.8              | 41.0                | 2.2                                  |
|                                         | No  | 32.1              | 32.9                | 0.8                                  |
| Attendance of courses in Italian        | Yes | 35.0              | 36.3                | 1.3                                  |
|                                         | No  | 31.9              | 32.7                | 0.8                                  |
| Language proficiency                    | Yes | 33.5              | 34.5                | 1.0                                  |
|                                         | No  | 30.6              | 31.3                | 0.7                                  |
| Catholic religion                       | Yes | 33.9              | 34.8                | 0.9                                  |
|                                         | No  | 31.6              | 32.5                | 0.9                                  |
| Feeling of Italy like home              | Yes | 33.2              | 34.3                | 1.1                                  |
|                                         | No  | 31.8              | 32.5                | 0.7                                  |
| <i>Ethnic network hyp.</i>              |     |                   |                     |                                      |
| High-income countries                   |     | 42.9              | 43.7                | 0.8                                  |
| Other high-emigration countries         |     | 32.1              | 33.1                | 1.0                                  |
| Romania                                 |     | 31.7              | 32.1                | 0.4                                  |
| Albania                                 |     | 29.3              | 30.9                | 1.6                                  |
| Ukraine                                 |     | 33.9              | 33.8                | -0.1                                 |
| Morocco                                 |     | 28.5              | 29.7                | 1.2                                  |
| Chine                                   |     | 38.7              | 40.2                | 1.5                                  |
| Philippines                             |     | 28.8              | 29.3                | 0.5                                  |
| Tunisia                                 |     | 27.0              | 28.3                | 1.3                                  |
| Job found due to compatriots            | Yes | 30.8              | 31.2                | 0.4                                  |
|                                         | No  | 33.6              | 34.9                | 1.3                                  |
